# Supplementary material for: Single Nucleotide Polymorphisms, Gene Expression and Economic Evaluation of Parameters Associated with Mastitis Susceptibility in European Cattle Breeds
Source: MDPI journal article supplement (doi:10.3390/vetsci9060294), 2022-06-14
Supplement: s1 [file s1]

|             |                                                              |     |
|-------------|--------------------------------------------------------------|-----|
| TH          | GAAAGAAAGTAAGCCTTTCTGGGGACAGTGAGTGCAGTCTCCCTGCACACCCAGCCTTGG | 60  |
| NM_174182.1 | GAAAGAAAGTAAGCCTTTCTGGGGACAGTGAGTGCAGTCTCCCTGCACACCCAGCCTTGG | 60  |
| MH          | GAAAGAAAGTAAGCCTTTCTGGGGACAGTGAGTGCAGTCTCCCTGCACACCCAGCCTTGG | 60  |
| TB          | GAAAGAAAGTAAGCCTTTCTGGGGACAGTGAGTGCAGTCTCCCTGCACACCCAGCCTTGG | 60  |
| MB          | GAAAGAAAGTAAGCCTTTCTGGGGACAGTGAGTGCAGTCTCCCTGCACACCCAGCCTTGG | 60  |
|             | *****                                                        |     |
| TH          | GCAAGGATCCAGAGACCTGTGGTGCTGAGCTGAGAGGCTGAAGGGCTACGAAAGGACGGA | 120 |
| NM_174182.1 | GCAAGGATCCAGAGACCTGTGGTGCTGAGCTGAGAGGCTGAAGGGCTACGAAAGGACGGA | 120 |
| MH          | GCAAGGATCCAGAGACCTGTGGTGCTGAGCTGAGAGGCTGAAGGGCTACGAAAGGACGGA | 120 |
| TB          | GCAAGGATCCAGAGACCTGTGGTGCTGAGCTGAGAGGCTGAAGGGCTACGAAAGGACGGA | 120 |
| MB          | GCAAGGATCCAGAGACCTGTGGTGCTGAGCTGAGAGGCTGAAGGGCTACGAAAGGACGGA | 120 |
|             | *****                                                        |     |
| TH          | GCAAAGCCATGCTATGTCCATGGAATGTCAAATGCTCAGAGGGGCTTATGGAATGTCT   | 180 |
| NM_174182.1 | GCAAAGCCATGCTATGTCCATGGAATGTCAAATGCTCAGAGGGGCTTATGGAATGTCT   | 180 |
| MH          | GCAAAGCCATGCTATGTCCATGGAATGTCAAATGCTCAGAGGGGCTTATGGAATGTCT   | 180 |
| TB          | GCAAAGCCATGCTATGTCCATGGAATGTCAAATGCTCAGAGGGGCTTATGGAATGTCT   | 180 |
| MB          | GCAAAGCCATGCTATGTCCATGGAATGTCAAATGCTCAGAGGGGCTTATGGAATGTCT   | 180 |
|             | *****                                                        |     |
| TH          | TTAAACTGTGGGTCTGGATTATGCTCTGTTGTGATTCTTTGCTCATCGTGGCACCATT   | 240 |
| NM_174182.1 | TTAAACTGTGGGTCTGGATTATGCTCTGTTGTGATTCTTTGCTCATCGTGGCACCATT   | 240 |
| MH          | TTAAACTGTGGGTCTGGATTATGCTCTGTTGTGATTCTTTGCTCATCGTGGCACCATT   | 240 |
| TB          | TTAAACTGTGGGTCTGGATTATGCTCTGTTGTGATTCTTTGCTCATCGTGGCACCATT   | 240 |
| MB          | TTAAACTGTGGGTCTGGATTATGCTCTGTTGTGATTCTTTGCTCATCGTGGCACCATT   | 240 |
|             | *****                                                        |     |
| TH          | GCTGGACTTACCATTATTCTAAAAGACCCATGCCCTGGGAAAAGGCTAGAGCGTTCTGCA | 300 |
| NM_174182.1 | GCTGGACTTACCATTATTCTAAAAGACCCATGCCCTGGGAAAAGGCTAGAGCGTTCTGCA | 300 |
| MH          | GCTGGACTTACCATTATTCTAAAAGACCCATGCCCTGGGAAAAGGCTAGAGCGTTCTGCA | 300 |
| TB          | GCTGGACTTACCATTATTCTAAAAGACCCATGCCCTGGGAAAAGGCTAGAGCGTTCTGCA | 300 |
| MB          | GCTGGACTTACCATTATTCTAAAAGACCCATGCCCTGGGAAAAGGCTAGAGCGTTCTGCA | 300 |
|             | *****                                                        |     |
| TH          | GGGAAAATTACACAGATTTAGTTGCCATACAAAACAAGGGAGAGATCGAATACCTGAATA | 360 |
| NM_174182.1 | GGGAAAATTACACAGATTTAGTTGCCATACAAAACAAGGGAGAGATCGAATACCTGAATA | 360 |
| MH          | GGGAAAATTACACAGATTTAGTTGCCATACAAAACAAGGGAGAGATCGAATACCTGAATA | 360 |
| TB          | GGGAAAATTACACAGATTTAGTTGCCATACAAAACAAGGGAGAGATCGAATACCTGAATA | 360 |
| MB          | GGGAAAATTACACAGATTTAGTTGCCATACAAAACAAGGGAGAGATCGAATACCTGAATA | 360 |
|             | *****                                                        |     |
| TH          | AGACACTTCCCTTCAGCCGTACTTACTACTGGATTGGAATCCGGAAAGTAGAAGGGGTGT | 420 |
| NM_174182.1 | AGACACTTCCCTTCAGCCGTACTTACTACTGGATTGGAATCCGGAAAGTAGAAGGGGTGT | 420 |
| MH          | AGACACTTCCCTTCAGCCGTACTTACTACTGGATTGGAATCCGGAAAGTAGAAGGGGTGT | 420 |
| TB          | AGACACTTCCCTTCAGCCGTACTTACTACTGGATTGGAATCCGGAAAGTAGAAGGGGTGT | 420 |
| MB          | AGACACTTCCCTTCAGCCGTACTTACTACTGGATTGGAATCCGGAAAGTAGAAGGGGTGT | 420 |
|             | *****                                                        |     |
| TH          | GGACTTGGGTGGGAACCAACAAATCTCTCACTGAAGAAGCAAAGAACTGGGGTGCAGGGG | 480 |
| NM_174182.1 | GGACTTGGGTGGGAACCAACAAATCTCTCACTGAAGAAGCAAAGAACTGGGGTGCAGGGG | 480 |
| MH          | GGACTTGGGTGGGAACCAACAAATCTCTCACTGAAGAAGCAAAGAACTGGGGTGCAGGGG | 480 |
| TB          | GGACTTGGGTGGGAACCAACAAATCTCTCACTGAAGAAGCAAAGAACTGGGGTGCAGGGG | 480 |
| MB          | GGACTTGGGTGGGAACCAACAAATCTCTCACTGAAGAAGCAAAGAACTGGGGTGCAGGGG | 480 |
|             | *****                                                        |     |
| TH          | AGCCCAACAACAGGAAGAGTAAGGAGGACTGTGTGGAATCTATATCAAGAGGAACAAAG  | 540 |
| NM_174182.1 | AGCCCAACAACAGGAAGAGTAAGGAGGACTGTGTGGAATCTATATCAAGAGGAACAAAG  | 540 |
| MH          | AGCCCAACAACAGGAAGAGTAAGGAGGACTGTGTGGAATCTATATCAAGAGGAACAAAG  | 540 |
| TB          | AGCCCAACAACAGGAAGAGTAAGGAGGACTGTGTGGAATCTATATCAAGAGGAACAAAG  | 540 |
| MB          | AGCCCAACAACAGGAAGAGTAAGGAGGACTGTGTGGAATCTATATCAAGAGGAACAAAG  | 540 |
|             | *****                                                        |     |
| TH          | ACTCGGGGAAATGGAATGATGATGCCTGCCACAAAGCAAAGACAGCCCTCTGCTACACAG | 600 |
| NM_174182.1 | ACTCGGGGAAATGGAATGATGATGCCTGCCACAAAGCAAAGACAGCCCTCTGCTACACAG | 600 |
| MH          | ACTCGGGGAAATGGAATGATGATGCCTGCCACAAAGCAAAGACAGCCCTCTGCTACACAG | 600 |
| TB          | ACTCGGGGAAATGGAATGATGATGCCTGCCACAAAGCAAAGACAGCCCTCTGCTACACAG | 600 |
| MB          | ACTCGGGGAAATGGAATGATGATGCCTGCCACAAAGCAAAGACAGCCCTCTGCTACACAG | 600 |
|             | *****                                                        |     |
| TH          | CTTCTTGTAACCCTGGTCATGCAGCGGCCATGGACAATGTGTGGAAGTCATCAATAATT  | 660 |
| NM_174182.1 | CTTCTTGTAACCCTGGTCATGCAGCGGCCATGGACAATGTGTGGAAGTCATCAATAATT  | 660 |
| MH          | CTTCTTGTAACCCTGGTCATGCAGCGGCCATGGACAATGTGTGGAAGTCATCAATAATT  | 660 |
| TB          | CTTCTTGTAACCCTGGTCATGCAGCGGCCATGGACAATGTGTGGAAGTCATCAATAATT  | 660 |
| MB          | CTTCTTGTAACCCTGGTCATGCAGCGGCCATGGACAATGTGTGGAAGTCATCAATAATT  | 660 |
|             | *****                                                        |     |
| TH          | ACACCTGCAACTGTGATTGGGGTACTACGGGCCTGAGTGTGAGTTCGTGACTCAATGTG  | 720 |
| NM_174182.1 | ACACCTGCAACTGTGATTGGGGTACTACGGGCCTGAGTGTGAGTTCGTGACTCAATGTG  | 720 |
| MH          | ACACCTGCAACTGTGATTGGGGTACTACGGGCCTGAGTGTGAGTTCGTGACTCAATGTG  | 720 |
| TB          | ACACCTGCAACTGTGATTGGGGTACTACGGGCCTGAGTGTGAGTTCGTGACTCAATGTG  | 720 |
| MB          | ACACCTGCAACTGTGATTGGGGTACTACGGGCCTGAGTGTGAGTTCGTGACTCAATGTG  | 720 |

```

*****
TH      TGCCTTTGGAGGCCCCAAAGCTGGGTACCATGGCCTGCACTCACCCCTTTGGGGAACTTCA      780
NM_174182.1 TGCCTTTGGAGGCCCCAAAGCTGGGTACCATGGCCTGCACTCACCCCTTTGGGGAACTTCA      780
MH      TGCCTTTGGAGGCCCCAAAGCTGGGTACCATGGCCTGCACTCACCCCTTTGGGGAACTTCA      780
TB      TGCCTTTGGAGGCCCCAAAGCTGGGTACCATGGCCTGCACTCACCCCTTTGGGGAACTTCA      780
MB      TGCCTTTGGAGGCCCCAAAGCTGGGTACCATGGCCTGCACTCACCCCTTTGGGGAACTTCA      780
*****

TH      GCTTCATGTCGCAGTGTGCCTTCAACTGC      809
NM_174182.1 GCTTCATGTCGCAGTGTGCCTTCAACTGC      809
MH      GCTTCATGTCGCAGTGTGCCTTCAACTGC      809
TB      GCTTCATGTCGCAGTGTGCCTTCAACTGC      809
MB      GCTTCATGTCGCAGTGTGCCTTCAACTGC      809
*****

```

**Fig. S1.** Representative DNA sequence alignment of *SELL* gene (809-bp) among tolerant and mastitis affected Holstein and Brown Swiss dairy cows and reference sequence available in the GenBank gb|NM\_174182.1|. TH= Tolerant Holstein; MH= Mastitic Holstein; TB= Tolerant Brown Swiss and MB= Mastitic Brown Swiss. The asterisks represent the similarity.

EU570105.1 AAAGCTTGCGAAGTGAGGCTGAAGTCGGTGCTGCCTGCGCTCGCTCGTCGGCCCTCGACC 48  
 TH AAAGCTTGCGAAGTGAGGCTGAAGTCGGTGCTGCCTGCGCTCGCTCGTCGGCCCTCGACC 48  
 MH AAAGCTTGCGAAGTGAGGCTGAAGTCGGTGCTGCCTGCGCTCGCTCGTCGGCCCTCGACC 48  
 TB AAAGCTTGCGAAGTGAGGCTGAAGTCGGTGCTGCCTGCGCTCGCTCGTCGGCCCTCGACC 60  
 MB AAAGCTTGCGAAGTGAGGCTGAAGTCGGTGCTGCCTGCGCTCGCTCGTCGGCCCTCGACC 60  
 \*\*\*\*\*  
 EU570105.1 GCCGGCTCGCCGCCCGCTCTCTCCGACGTGACGGTAACCCGGGGCCATTGCCTTCCCAGG 120  
 TH GCCGGCTCGCCGCCCGCTCTCTCCGACGTGACGGTAACCCGGGGCCATTGCCTTCCCAGG 120  
 MH GCCGGCTCGCCGCCCGCTCTCTCCGACGTGACGGTAACCCGGGGCCAGTGCCTTCCCAGG 120  
 TB GCCGGCTCGCCGCCCGCTCTCTCCGACGTGACGGTAACCCGGGGCCATTGCCTTCCCAGG 120  
 MB GCCGGCTCGCCGCCCGCTCTCTCCGACGTGGCGGTAACCCGGGGCCATTGCCTTCCCAGG 120  
 \*\*\*\*\*  
 EU570105.1 TCAGCCGCTGCGCCGGAAGGCGGAAATGCTCAAAATGTCTTCCAATAGTTACGAGGTTTC 180  
 TH TCAGCCGCTGCGCCGGAAGGCGGAAATGCTCAAAATGTCTTCCAATAGTTACGAGGTTTC 180  
 MH TCAGCCGCTGCGCCGGAAGGCGGAAATGCTCAAAATGTCTTCCAATAGTTACGAGGTTTC 180  
 TB TCAGCCGCTGCGCCGGAAGGCGGAAATGCTCAAAATGTCTTCCAATAGTTACGAGGTTTC 180  
 MB TCAGCCGCTGCGCCGGAAGGCGGAAATGCTCAAAATGTCTTCCAATAGTTACGAGGTTTC 180  
 \*\*\*\*\*  
 EU570105.1 TATCCCAATGTCAAAAAAATCAACGGCATTCCAGAGACAACCTCTAAGGACCTGCAGAC 240  
 TH TATCCCAATGTCAAAAAAATCAACGGCATTCCAGAGACAACCTCTAAGGACCTGCAGAC 240  
 MH TATCCCAATGTCAAAAAAATCAACGGCATTCCAGAGACAACCTCTAAGGACCTGCAGAC 240  
 TB TATCCCAATGTCAAAAAAATCAACGGCATTCCAGAGACAACCTCTAAGGACCTGCAGAC 240  
 MB TATCCCAATGTCAAAAAAATCAACGGCATTCCAGAGACAACCTCTAAGGACCTGCAGAC 240  
 \*\*\*\*\*  
 EU570105.1 ATTAAGTGAAGGAGCTGTGTTAAGTTTTTCATAACATCTGCTATCGAGTAAAAGTGAAGAC 300  
 TH ATTAAGTGAAGGAGCTGTGTTAAGTTTTTCATAACATCTGCTATCGAGTAAAAGTGAAGAC 300  
 MH ATTAAGTGAAGGAGCTGTGTTAAGTTTTTCATAACATCTGCTATCGAGTAAAAGTGAAGAC 300  
 TB ATTAAGTGAAGGAGCTGTGTTAAGTTTTTCATAACATCTGCTATCGAGTAAAAGTGAAGAC 300  
 MB ATTAAGTGAAGGAGCTGTGTTAAGTTTTTCATAACATCTGCTATCGAGTAAAAGTGAAGAC 300  
 \*\*\*\*\*  
 EU570105.1 TGGCTTTCTACTTTGTTCGGAAGAACAAATGAGAAAGAAATACTAGCAAATATCAATGGAGT 360  
 TH TGGCTTTCTACTTTGTTCGGAAGAACAAATGAGAAAGAAATACTAGCAAATATCAATGGAGT 360  
 MH TGGCTTTCTACTTTGTTCGGAAGAACAAATGAGAAAGAAATACTAGCAAATATCAATGGAGT 360  
 TB TGGCTTTCTACTTTGTTCGGAAGAACAAATGAGAAAGAAATACTAGCAAATATCAATGGAGT 360  
 MB TGGCTTTCTACTTTGTTCGGAAGAACAAATGAGAAAGAAATACTAGCAAATATCAATGGAGT 360  
 \*\*\*\*\*  
 EU570105.1 CATGAAACCTGGCCTCAATGCCATTCTGGGACCCACAGGTGGAGGCAAATCTTCGTTGTT 420  
 TH CATGAAACCTGGCCTCAATGCCATTCTGGGACCCACAGGTGGAGGCAAATCTTCGTTGTT 420  
 MH CATGAAACCTGGCCTCAATGCCATTCTGGGACCCACAGGTGGAGGCAAATCTTCGTTGTT 420  
 TB CATGAAACCTGGCCTCAATGCCATTCTGGGACCCACAGGTGGAGGCAAATCTTCGTTGTT 420  
 MB CATGAAACCTGGCCTCAATGCCATTCTGGGACCCACAGGTGGAGGCAAATCTTCGTTGTT 420  
 \*\*\*\*\*  
 EU570105.1 AGATATCTTAGCTGCAAGGAAGGATCCACATGGATTATCTGGAGATGTTTTGATCAATGG 480  
 TH AGATATCTTAGCTGCAAGGAAGGATCCACATGGATTATCTGGAGATGTTTTGATCAATGG 480  
 MH AGATATCTTAGCTGCAAGGAAGGATCCACATGGATTATCTGGAGATGTTTTGATCAATGG 480  
 TB AGATATCTTAGCTGCAAGGAAGGATCCACATGGATTATCTGGAGATGTTTTGATCAATGG 480  
 MB AGATATCTTAGCTGCAAGGAAGGATCCACATGGATTATCTGGAGATGTTTTGATCAATGG 480  
 \*\*\*\*\*  
 EU570105.1 AGCACCTCGACCTGCCAATTTTAAATGTAACCTCAGGTTATGTGGTACAAGATGATGTTGT 540  
 TH AGCACCTCGACCTGCCAATTTTAAATGTAACCTCAGGTTATGTGGTACAAGATGATGTTGT 540  
 MH AGCACCTCGACCTGCCAATTTTAAATGTAACCTCAGGTTATGTGGTACAAGATGATGTTGT 540  
 TB AGCACCTCGACCTGCCAATTTTAAATGTAACCTCAGGTTATGTGGTACAAGATGATGTTGT 540  
 MB AGCACCTCGACCTGCCAATTTTAAATGTAACCTCAGGTTATGTGGTACAAGATGATGTTGT 540  
 \*\*\*\*\*  
 EU570105.1 GATGGGAACCTCTGACAGTGAGAGAAAACCTTACAGTTCTCAGCAGCCCTTCGGCTTCCAAC 600  
 TH GATGGGAACCTCTGACAGTGAGAGAAAACCTTACAGTTCTCAGCAGCCCTTCGGCTTCCAAC 600  
 MH GATGGGAACCTCTGACAGTGAGAGAAAACCTTACAGTTCTCAGCAGCCCTTCGGCTTCCAAC 600  
 TB GATGGGAACCTCTGACAGTGAGAGAAAACCTTACAGTTCTCAGCAGCCCTTCGGCTTCCAAC 600  
 MB GATGGGAACCTCTGACAGTGAGAGAAAACCTTACAGTTCTCAGCAGCCCTTCGGCTTCCAAC 600  
 \*\*\*\*\*  
 EU570105.1 AACTATGACAAGTTACGAAAAAATGAACGGATTAACAAGGTTATTCAAGAGTTAGGTCT 660  
 TH AACTATGACAAGTTACGAAAAAATGAACGGATTAACAAGGTTATTCAAGAGTTAGGTCT 660  
 MH AACTATGACAAGTTACGAAAAAATGAACGGATTAACAAGGTTATTCAAGAGTTAGGTCT 660

|            |                                                               |     |
|------------|---------------------------------------------------------------|-----|
| TB         | AACTATGACAAGTTACGAAAAAATGAACAGATTAACAAGGTTATTCAAGAGTTAGGTCT   | 660 |
| MB         | AACTATGACAAGTTACGAAAAAATGAACGATTAAACAAGGTTATTCAAGAGTTAGGTCT   | 660 |
|            | *****                                                         |     |
| EU570105.1 | GGATAAAGTGGCAGATTCCAAGGTTGGAACCTCAGTTTATCCGTGGTGTGTCTGGAGGAGA | 720 |
| TH         | GGATAAAGTGGCAGATTCCAAGGTTGGAACCTCAGTTTATCCGTGGTGTGTCTGGAGGAGA | 720 |
| MH         | GGATAAAGTGGCAGATTCCAAGGTTGGAACCTCAGTTTATCCGTGGTGTGTCTGGAGGAGA | 720 |
| TB         | GGATAAAGTGGCAGATTCCAAGGTTGGAACCTCAGTTTATCCGTGGTGTGTCTGGAGGAGA | 720 |
| MB         | GGATAAAGTGGCAGATTCCAAGGTTGGAACCTCAGTTTATCCGTGGTGTGTCTGGAGGAGA | 720 |
|            | *****                                                         |     |
| EU570105.1 | AAGAAAAAGGACTAGTATTGCAATGGAGCTTATTAC                          | 756 |
| TH         | AAGAAAAAGGACTAGTATTGCAATGGAGCTTATTAC                          | 756 |
| MH         | AAGAAAAAGGACTAGTATTGCAATGGAGCTTATTAC                          | 756 |
| TB         | AAGAAAAAGGACTAGTATTGCAATGGAGCTTATTAC                          | 756 |
| MB         | AAGAAAAAGGACTAGTATTGCAATGGAGCTTATTAC                          | 756 |
|            | *****                                                         |     |

**Fig. S2.** Representative DNA sequence alignment of *ABCG2* gene (756-bp) among tolerant and mastitis affected Holstein and Brown Swiss dairy cows and reference sequence available in the GenBank gb|EU570105.1|. TH= Tolerant Holstein; MH= Mastitic Holstein; TB= Tolerant Brown Swiss and MB= Mastitic Brown Swiss. The asterisks represent the similarity.

|             |                                                               |     |
|-------------|---------------------------------------------------------------|-----|
| NM_174652.2 | GCTTGCCATGCCCCTGAGGGGCTGCCCGGCACGCCAGCCACTCGCACAGAGAGTGCCCGA  | 60  |
| TH          | GCTTGCCATGCCCCTGAGGGGCTGCCCGGCACGCCAGCCACTCGCACAGAGAGTGCCCGA  | 60  |
| MH          | GCTTGCCATGCCCCTGAGGGGCTGCCCGGCACGCCAGCCACTCGCACAGAGAGTGCCCGA  | 60  |
| TB          | GCTTGCCATGCCCCTGAGGGGCTGCCCGGCACGCCAGCCACTCGCACAGAGAGTGCCCGA  | 60  |
| MB          | GCTTGCCATGCCCCTGAGGGGCTGCCCGGCACGCCAGCCACTCGCACAGAGAGTGCCCGA  | 60  |
|             | *****                                                         |     |
| NM_174652.2 | GCCTGCGGTCTCATGTCTCAGGTGACACGGGGCCCCCAAAGCAGGGAGGGACCAGATATGG | 120 |
| TH          | GCCTGCGGTCTCATGTCTCAGGTGACACGGGGCCCCCAAAGCAGGGAGGGACCAGATATGG | 120 |
| MH          | GCCTGCGGTCTCATGTCTCAGGTGACACGGGGCCCCCAAAGCAGGGAGGGACCAGATATGG | 120 |
| TB          | GCCTGCGGTCTCATGTCTCAGGTGACACGGGGCCCCCAAAGCAGGGAGGGACCAGATATGG | 120 |
| MB          | GCCTGCGGTCTCATGTCTCAGGTGACACGGGGCCCCCAAAGCAGGGAGGGACCAGATATGG | 120 |
|             | *****                                                         |     |
| NM_174652.2 | CTCCATCTCCAGCCCACCCAGTCCAGAGCCACAGCAAGCACCTCCCGGAGGGACCTACCT  | 180 |
| TH          | CTCCATCTCCAGCCCACCCAGTCCAGAGCCACAGCAAGCACCTCCCGGAGGGACCTACCT  | 180 |
| MH          | CTCCATCTCCAGCCCACCCAGTCCAGAGCCACAGCAAGCACCTCCCGGAGGGACCTACCT  | 180 |
| TB          | CTCCATCTCCAGCCCACCCAGTCCAGAGCCACAGCAAGCGCCTCCCGGAGGGACCTACCT  | 180 |
| MB          | CTCCATCTCCAGCCCACCCAGTCCAGAGCCACAGCAAGCACCTCCCGGAGGGACCTACCT  | 180 |
|             | *****                                                         |     |
| NM_174652.2 | AAGTGAGAAGATCCCCATTCCGGATACAGAATCGGGTACATTACGCCTGAGGAAGCTGTG  | 240 |
| TH          | AAGTGAGAAGATCCCCATTCCGGATACAGAATCGGGTACATTACGCCTGAGGAAGCTGTG  | 240 |
| MH          | AAGTGAGAAGATCCCCATTCCGGATACAGAATCGGGTACATTACGCCTGCGGAAGCTGTG  | 240 |
| TB          | AAGTGAGAAGATCCCCATTCCGGATACAGAATCGGGTGCATTACGCCTGAGGAAGCTGTG  | 240 |
| MB          | AAGTGAGAAGATCCCCATTCCGGATACAGAATCGGGTACATTACGCCTGAGGAAGCTGTG  | 240 |
|             | *****                                                         |     |
| NM_174652.2 | GGCCTTCACGGGGCCTGGATTCTCTCATGAGCATCGCATTCTGGACCCAGGAAACATTGA  | 300 |
| TH          | GGCCTTCACGGGGCCTGGATTCTCTCATGAGCATCGCATTCTGGACCCAGGAAACATTGA  | 300 |
| MH          | GGCCTTCACGGGGCCTGGATTCTCTCATGAGCATCGCATTCTGGACCCAGGAAACATTGA  | 300 |
| TB          | GGCCTTCACGGGGCCTGGATTCTCTCATGAGCATCGCATTCTGGACCCAGGAAACATTGA  | 300 |
| MB          | GGCCTTCACGGGGCCTGGATTCTCTCATGAGCATCGCATTCTGGACCCAGGAAACATTGA  | 300 |
|             | *****                                                         |     |
| NM_174652.2 | GTCGGATCTTCAGGCTGGGGCTGTGGCTGGATTCAAACCTGCTCTGGGTGCTGCTGTGGGC | 360 |
| TH          | GTCGGATCTTCAGGCTGGGGCTGTGGCTGGATTCAAACCTGCTCTGGGTGCTGCTGTGGGC | 360 |
| MH          | GTCGGATCTTCAGGCTGGGGCTGTGGCTGGATTCAAACCTGCTCTGGGTGCTGCTGTGGGC | 360 |
| TB          | GTCGGATCTTCAGGCTGGGGCTGTGGCTGGATTCAAACCTGCTCTGGGTGCTGCTGTGGGC | 360 |
| MB          | GTCGGATCTTCAGGCTGGGGCTGTGGCTGGATTCAAACCTGCTCTGGGTGCTGCTGTGGGC | 360 |
|             | *****                                                         |     |
| NM_174652.2 | CACAGTGTGGGCTTGCTTTGCCAGCGACTGGCTGCCCCGGCTGGGCGTGGTGACAGGCCAA | 420 |
| TH          | CACAGTGTGGGCTTGCTTTGCCAGCGACTGGCTGCCCCGGCTGGGCGTGGTGACAGGCCAA | 420 |
| MH          | CACAGTGTGGGCTTGCTTTGCCAGCGACTGGCTGCCCCGGCTGGGCGTGGTGACAGGCCAA | 420 |
| TB          | CACAGTGTGGGCTTGCTTTGCCAGCGACTGGCTGCCCCGGCTGGGCGTGGTGACAGGCCAA | 420 |
| MB          | CACAGTGTGGGCTTGCTTTGCCAGCGACTGGCTGCCCCGGCTGGGCGTGGTGACAGGCCAA | 420 |
|             | *****                                                         |     |
| NM_174652.2 | GGACTTGGGCGAGGTCTGCCATCTCTACTA 450                            |     |
| TH          | GGACTTGGGCGAGGTCTGCCATCTCTACTA 450                            |     |
| MH          | GGACTTGGGCGAGGTCTGCCATCTCTACTA 450                            |     |
| TB          | GGACTTGGGCGAGGTCTGCCATCTCTACTA 450                            |     |
| MB          | GGACTTGGGCGAGGTCTGCCATCTCTACTA 450                            |     |
|             | *****                                                         |     |

**Fig. S3.** Representative DNA sequence alignment of *SLC11A1* gene (450-bp) among tolerant and mastitis affected Holstein and Brown Swiss dairy cows and reference sequence available in the GenBank gb|NM\_174652.2|. TH= Tolerant Holstein; MH= Mastitic Holstein; TB= Tolerant Brown Swiss and MB= Mastitic Brown Swiss. The asterisks represent the similarity.

|                |                                                               |     |
|----------------|---------------------------------------------------------------|-----|
| NM_001038198.2 | GATTGGACCGTCTCAATTATACAAACATGACTTCATGTGATGTCAGCTGAATGTAAAAGA  | 60  |
| TH             | GATTGGACCGTCTCAATTATACAAACATGACTTCATGTGATGTCAGCTGAATGTAAAAGA  | 60  |
| MH             | GATTGGACCGTCTCAATTATACAAACATGACTTCATGTGATGTCAGCTGAATGTAAAAGA  | 60  |
| TB             | GATTGGACCGTCTCAATTATACAAACATGACTTCATGTGATGTCAGCTGAATGTAAAAGA  | 60  |
| MB             | GATTGGACCGTCTCAATTATACAAACATGACTTCATGTGATGTCAGCTGAATGTAAAAGA  | 60  |
| *****          |                                                               |     |
| NM_001038198.2 | CAGTGATCTCACGCGGAGGGGAAGATGTTTGCCATCAAATGTGACAGAGGAGACAGGCT   | 120 |
| TH             | CAGTGATCTCACGCGGAGGGGAAGATGTTTGCCATCAAATGTGACAGAGGAGACAGGCT   | 120 |
| MH             | CAGTGATCTCACGCGGAGGGGAAGATGTTTGCCATCAAATGTGACAGAGGAGACAGGCT   | 120 |
| TB             | CAGTGATCTCACGCGGAGGGGAAGATGTTTGCCATCAAATGTGACAGAGGAGACAGGCT   | 120 |
| MB             | CAGTGATCTCACGCGGAGGGGAAGATGTTTGCCATCAAATGTGACAGAGGAGACAGGCT   | 120 |
| *****          |                                                               |     |
| NM_001038198.2 | GCATGGCTCGGACCGCATCTCCTTGCGGTTGGGGGAAAGAGACTTAGAGGAGAGAGGCTG  | 180 |
| TH             | GCATGGCTCGGACCGCATCTCCTTGCGGTTGGGGGAAAGAGACTTAGAGGAGAGAGGCTG  | 180 |
| MH             | GCATGGCTCGGACCGCATCTCCTTGCGGTTGGGGGAAAGAGACTTAGAGGAGAGAGGCTG  | 180 |
| TB             | GCATGGCTCGGACCGCATCTCCTTGCGGTTGGGGGAAAGAGACTTAGAGGAGAGAGGCTG  | 180 |
| MB             | GCATGGCTCGGACCGCATCTCCTTGCGGTTGGGGGAAAGAGACTTAGAGGAGAGAGGCTG  | 180 |
| *****          |                                                               |     |
| NM_001038198.2 | CGCCCTGGCCCAGTCCGGTACGACTCGGCTCGGCGGCCATGGCAAGCTCGGCTTCCCTG   | 240 |
| TH             | CGCCCTGGCCCAGTCCGGTACGACTCGGCTCGGCGGCCATGGCAAGCTCGGCTTCCCTG   | 240 |
| MH             | CGCCCTGGCCCAGTCCGGTACGACTCGGCTCGGCGGCCATGGCAAGCTCGGCTTCCCTG   | 240 |
| TB             | CGCCCTGGCCCAGTCCGGTACGACTCGGCTCGGCGGCCATGGCAAGCTCGGCTTCCCTG   | 240 |
| MB             | CGCCCTGGCCCAGTCCGGTACGACTCGGCTCGGCGGCCATGGCAAGCTCGGCTTCCCTG   | 240 |
| *****          |                                                               |     |
| NM_001038198.2 | GAGACCATGGTGCCCCCGGCCTGCCCGCGCGCAGGAGCGTCGCCGGCCACTTCCAAGACT  | 300 |
| TH             | GAGACCATGGTGCCCCCGGCCTGCCCGCGCGCAGGAGCGTCGCCGGCCACTTCCAAGACT  | 300 |
| MH             | GAGACCATGGTGCCCCCGGCCTGCCCGCGCGCAGGAGCGTCGCCGGCCACTTCCAAGACT  | 300 |
| TB             | GAGACCATGGTGCCCCCGGCCTGCCCGCGCGCAGGAGCGTCGCCGGCCACTTCCAAGACT  | 300 |
| MB             | GAGACCATGGTGCCCCCGGCCTGCCCGCGCGCAGGAGCGTCGCCGGCCACTTCCAAGACT  | 300 |
| *****          |                                                               |     |
| NM_001038198.2 | CTGGCCTTTTCCATCGAGCGCATCATGGCTAAGACGTCGGAGCCCCGCGCGCCCTTTGAG  | 360 |
| TH             | CTGGCCTTTTCCATCGAGCGCATCATGGCTAAGACGTCGGAGCCCCGCGCGCCCTTTGAG  | 360 |
| MH             | CTGGCCTTTTCCATCGAGCGCATCATGGCTAAGACGTCGGAGCCCCGCGCGCCCTTTGAG  | 360 |
| TB             | CTGGCCTTTTCCATCGAGCGCATCATGGCTAAGACGTCGGAGCCCCGCGCGCCCTTTGAG  | 360 |
| MB             | CTGGCCTTTTCCATCGAGCGCATCATGGCTAAGACGTCGGAGCCCCGCGCGCCCTTTGAG  | 360 |
| *****          |                                                               |     |
| NM_001038198.2 | CCCCGGCCGGGGGCACCTGGAGGCGGATAGCGGCCAGGGCAAGAAATTGCTCAACCTCTGC | 420 |
| TH             | CCCCGGCCGGGGGCACCTGGAGGCGGATAGCGGCCAGGGCAAGAAATTGCTCAACCTCTGC | 420 |
| MH             | CCCCGGCCGGGGGCACCTGGAGGCGGATAGCGGCCAGGGCAAGAAATTGCTCAACCTCTGC | 420 |
| TB             | CCCCGGCCGGGGGCACCTGGAGGCGGATAGCGGCCAGGGCAAGAAATTGCTCAACCTCTGC | 420 |
| MB             | CCCCGGCCGGGGGCACCTGGAGGCGGATAGCGGCCAGGGCAAGAAATTGCTCAACCTCTGC | 420 |
| *****          |                                                               |     |
| NM_001038198.2 | TCGCCGCTGCCCTGTATGATCCCCCTCCAGCCCCTAGGCTACGAGATGCCGTCCAAGACG  | 480 |
| TH             | TCGCCGCTGCCCTGTATGATCCCCCTCCAGCCCCTAGGCTACGAGATGCCGTCCAAGACG  | 480 |
| MH             | TCGCCGCTGCCCTGTATGATCCCCCTCCAGCCCCTAGGCTACGAGATGCCGTCCAAGACG  | 480 |
| TB             | TCGCCGCTGCCCTGTATGATCCCCCTCCAGCCCCTAGGCTACGAGATGCCGTCCAAGACG  | 480 |
| MB             | TCGCCGCTGCCCTGTATGATCCCCCTCCAGCCCCTAGGCTACGAGATGCCGTCCAAGACG  | 480 |
| *****          |                                                               |     |
| NM_001038198.2 | CTGCTCAGTTACTCTGAGCTCTGGAAAAGCAGCCTCCGGGCGGGCGGCAGCGCGCGGGA   | 540 |
| TH             | CTGCTCAGTTACTCTGAGCTCTGGAAAAGCAGCCTCCGGGCGGGCGGCAGCGCGCGGGA   | 540 |
| MH             | CTGCTCAGTTACTCTGAGCTCTGGAAAAGCAGCCTCCGGGCGGGCGGCAGCGCGCGGGA   | 540 |
| TB             | CTGCTCAGTTACTCTGAGCTCTGGAAAAGCAGCCTCCGGGCGGGCGGCAGCGCGCGGGA   | 540 |
| MB             | CTGCTCAGTTACTCTGAGCTCTGGAAAAGCAGCCTCCGGGCGGGCGGCAGCGCGCGGGA   | 540 |
| *****          |                                                               |     |
| NM_001038198.2 | GGAGGAGGTGGAGGCGGCGGTGGGGGGGCCCGGTGTGCGGCGCCAGCGGCTTGTGCAAA   | 600 |
| TH             | GGAGGAGGTGGAGGCGGCGGTGGGGGGGCCCGGTGTGCGGCGCCAGCGGCTTGTGCAAA   | 600 |
| MH             | GGAGGAGGTGGAGGCGGCGGTGGGGGGGCCCGGTGTGCGGCGCCAGCGGCTTGTGCAAA   | 600 |
| TB             | GGAGGAGGTGGAGGCGGCGGTGGGGGGGCCCGGTGTGCGGCGCCAGCGGCTTGTGCAAA   | 600 |
| MB             | GGAGGAGGTGGAGGCGGCGGTGGGGGGGCCCGGTGTGCGGCGCCAGCGGCTTGTGCAAA   | 600 |
| *****          |                                                               |     |
| NM_001038198.2 | ACCAACTGTGGCGTGTGCTGCAAGGCCGAGCTGGGCCTGGTACCGTCGGCGCTGCCCGCG  | 660 |
| TH             | ACCAACTGTGGCGTGTGCTGCAAGGCCGAGCTGGGCCTGGTACCGTCGGCGCTGCCCGCG  | 660 |
| MH             | ACCAACTGTGGCGTGTGCTGCAAGGCCGAGCTGGGCCTGGTACCGTCGGCGCTGCCCGCG  | 660 |
| TB             | ACCAACTGTGGCGTGTGCTGCAAGGCCGAGCTGGGCCTGGTACCGTCGGCGCTGCCCGCG  | 660 |
| MB             | ACCAACTGTGGCGTGTGCTGCAAGGCCGAGCTGGGCCTGGTACCGTCGGCGCTGCCCGCG  | 660 |
| *****          |                                                               |     |
| NM_001038198.2 | GGCAGGGTCATCAAGCCCGAGGTCATCAACCAGGCTGTGGGGCTTCCGGCCAGCGGTTTCG | 720 |
| TH             | GGCAGGGTCATCAAGCCCGAGGTCATCAACCAGGCTGTGGGGCTTCCGGCCAGCGGTTTCG | 720 |
| MH             | GGCAGGGTCATCAAGCCCGAGGTCATCAACCAGGCTGTGGGGCTTCCGGCCAGCGGTTTCG | 720 |
| TB             | GGCAGGGTCATCAAGCCCGAGGTCATCAACCAGGCTGTGGGGCTTCCGGCCAGCGGTTTCG | 720 |
| MB             | GGCAGGGTCATCAAGCCCGAGGTCATCAACCAGGCTGTGGGGCTTCCGGCCAGCGGTTTCG | 720 |

```

*****
NM_001038198.2 CTCTACTACTTCAACTACCTGGACTCCGCCACTTACCCGTCGTCTGAGCTCCTCGGCGGC 780
TH CTCTACTACTTCAACTACCTGGACTCCGCCACTTACCCGTCGTCTGAGCTCCTCGGCGGC 780
MH CTCTACTACTTCAACTACCTGGACTCCGCCACTTACCCGTCGTCTGAGCTCCTCGGCGGC 780
TB CTCTACTACTTCAACTACCTGGACTCCGCCACTTACCCGTCGTCTGAGCTCCTCGGCGGC 780
MB CTCTACTACTTCAACTACCTGGACTCCGCCACTTACCCGTCGTCTGAGCTCCTCGGCGGC 780
*****
NM_001038198.2 CACCTCTTCCCGTCCGGTCTCCTCAACACACAG 813
TH CACCTCTTCCCGTCCGGTCTCCTCAACACACAG 813
MH CACCTCTTCCCGTCCGGTCTCCTCAACACACAG 813
TB CACCTCTTCCCGTCCGGTCTCCTCAACACACAG 813
MB CACCTCTTCCCGTCCGGTCTCCTCAACACACAG 813
*****

```

**Fig. S4.** Representative DNA sequence alignment of *FEZL* gene (813-bp) among tolerant and mastitis affected Holstein and Brown Swiss dairy cows and reference sequence available in the GenBank gb|NM\_001038198.2|. TH= Tolerant Holstein; MH= Mastitic Holstein; TB= Tolerant Brown Swiss and MB= Mastitic Brown Swiss. The asterisks represent the similarity.

|             |                                                              |     |
|-------------|--------------------------------------------------------------|-----|
| NM_174615.2 | GCTTGCCATGCCCCTGAGGGGCTGCCCGGCACGCCAGCCACTCGCACAGAGAGTGCCCGA | 60  |
| TH          | GCTTGCCATGCCCCTGAGGGGCTGCCCGGCACGCCAGCCACTCGCACAGAGAGTGCCCGA | 60  |
| MH          | GCTTGCCATGCCCCTGAGGGGCTGCCCGGCACGCCAGCCACTCGCACAGAGAGTGCCCGA | 60  |
| TB          | GCTTGCCATGCCCCTGAGGGGCTGCCCGGCACGCCAGCCACTCGCACAGAGAGTGCCCGA | 60  |
| MB          | GCTTGCCATGCCCCTGAGGGGCTGCCCGGCACGCCAGCCACTCGCACAGAGAGTGCCCGA | 60  |
|             | *****                                                        |     |
| NM_174615.2 | GCCTGCGGTCCTCATGTCAAGTGACACGGGCCCCCAAAGCAGGGAGGGAGCCAGATATGG | 120 |
| TH          | GCCTGCGGTCCTCATGTCAAGTGACACGGGCCCCCAAAGCAGGGAGGGAGCCAGATATGG | 120 |
| MH          | GCCTGCGGTCCTCATGTCAAGTGACACGGGCCCCCAAAGCAGGGAGGGAGCCAGATATGG | 120 |
| TB          | GCCTGCGGTCCTCATGTCAAGTGACACGGGCCCCCAAAGCAGGGAGGGAGCCAGATATGG | 120 |
| MB          | GCCTGCGGTCCTCATGTCAAGTGACACGGGCCCCCAAAGCAGGGAGGGAGCCAGATATGG | 120 |
|             | *****                                                        |     |
| NM_174615.2 | CTCCATCTCCAGCCCACCCAGTCCAGAGCCACAGCAAGCACCTCCCGGAGGGACCTACCT | 180 |
| TH          | CTCCATCTCCAGCCCACCCAGTCCAGAGCCACAGCAAGCGCCTCCCGGAGGGACCTACCT | 180 |
| MH          | CTCCATCTCCAGCCCACCCAGTCCAGAGCCACAGCAAGCACCTCCCGGAGGGACCTACCT | 180 |
| TB          | CTCCATCTCCAGCCCACCCAGTCCAGAGCCACAGCAAGCGCCTCCCGGAGGGACCTACCT | 180 |
| MB          | CTCCATCTCCAGCCCACCCAGTCCAGAGCCACAGCAAGCACCTCCCGGAGGGACCTACCT | 180 |
|             | *****                                                        |     |
| NM_174615.2 | AAGTGAGAAGATCCCCATTCCGGATACAGAATCGGGTACATTACGCCTGAGGAAGCTGTG | 240 |
| TH          | AAGTGAGAAGATCCCCATTCCGGATACAGAATCGGGTACATTACGCCTGAGGAAGCTGTG | 240 |
| MH          | AAGTGAGAAGATCCCCATTCCGGATACAGAATCGGGTACATTACGCCTGAGGAAGCTGTG | 240 |
| TB          | AAGTGAGAAGATCCCCATTCCGGATACAGAATCGGGTGCATTACGCCTGCGGAAGCTGTG | 240 |
| MB          | AAGTGAGAAGATCCCCATTCCGGATACAGAATCGGGTACATTACGCCTGAGGAAGCTGTG | 240 |
|             | *****                                                        |     |
| NM_174615.2 | GGCCTTCACGGGGCCTGGATTCTCATGAGCATCGCATTCTGGACCCAGGAAACATTGA   | 300 |
| TH          | GGCCTTCACGGGGCCTGGATTCTCATGAGCATCGCATTCTGGACCCAGGAAACATTGA   | 300 |
| MH          | GGCCTTCACGGGGCCTGGATTCTCATGAGCATCGCATTCTGGACCCAGGAAACATTGA   | 300 |
| TB          | GGCCTTCACGGGGCCTGGATTCTCATGAGCATCGCATTCTGGACCCAGGAAACATTGA   | 300 |
| MB          | GGCCTTCACGGGGCCTGGATTCTCATGAGCATCGCATTCTGGACCCAGGAAACATTGA   | 300 |
|             | *****                                                        |     |
| NM_174615.2 | GTCCGATCTTCAGGCTGGGGCTGTGGCTGGATTC                           | 334 |
| TH          | GTCCGATCTTCAGGCTGGGGCTGTGGCTGGATTC                           | 334 |
| MH          | GTCCGATCTTCAGGCTGGGGCTGTGGCTGGATTC                           | 334 |
| TB          | GTCCGATCTTCAGGCTGGGGCTGTGGCTGGATTC                           | 334 |
| MB          | GTCCGATCTTCAGGCTGGGGCTGTGGCTGGATTC                           | 334 |
|             | *****                                                        |     |

**Fig. S5.** Representative DNA sequence alignment of *SOD1* gene (334-bp) among tolerant and mastitis affected Holstein and Brown Swiss dairy cows and reference sequence available in the GenBank gb|NM\_174615.2|. TH= Tolerant Holstein; MH= Mastitic Holstein; TB= Tolerant Brown Swiss and MB= Mastitic Brown Swiss. The asterisks represent the similarity.



```

MK423993.1      CTATCCTGACACTCACCGCCACCGCCTGGGACCCAACCTATCTCCAGATACCTGTGAACTG 60
TH              CTATCCTGACACTCACCGCCACCGCCTGGGACCCAACCTATCTCCAGATACCTGTGAACTG 60
MH              CTATCCTGACACTCACCGCCACCGCCTGGGACCCAACCTATCTCCAGATACCTGTGAACTG 60
TB              CTATCCTGACACTCACCGCCACCGCCTGGGACCCAACCTATCTCCAGATACCTGTGAACTG 60
MB              CTATCCTGACACTCACCGCCACCGCCTGGGACCCAACCTATCTCCAGATACCTGTGAACTG 60
                *****

MK423993.1      TCCCTACCGTGCTCGAGTGGCCAACTACCAGCGTGACGGCCCCATGTGCATGATGGACAA 120
TH              TCCCTACCGTGCTCGAGTGGCCAACTACCAGCGTGACGGCCCCATGTGCATGATGGACAA 120
MB              TCCCTACCGTGCTCGAGTGGCCAACTACCAGCGTGACGGCCCCATGTGCATGATGGACAA 120
TB              TCCCTACCGTGCTCGAGTGGCCAACTACCAGCGTGACGGCCCCATGTGCATGATGGACAA 120
MB              TCCCTACCGTGCTCGAGTGGCCAACTACCAGCGTGACGGCCCCATGTGCATGATGGACAA 120
                *****

MK423993.1      TCAGGGTGGGGCTCCAAATTACTACCCCAATAGCTTTAGTGCTCCCGAGCATCAGCCTTC 180
TH              TCAGGGTGGGGCTCCAAATTACTACCCCAATAGCTTTAGTGCTCCCGAGCATCAGCCTTC 180
MH              TCAGGGTGGGGCTCCAAATTACTACCCCAATAGCTTTAGTGCTCCCGAGCATCAGCCTTC 180
TB              TCAGGGTGGGGCTCCAAATTACTACCCCAATAGCTTTAGTGCTCCCGAGCATCAGCCTTC 180
MB              TCAGGGTGGGGCTCCAAATTACTACCCCAATAGCTTTAGTGCTCCCGAGCATCAGCCTTC 180
                *****

MK423993.1      TGCCCTGGAACACAGGACCCACTTCTCTGGGGATGTACAGCGCTTCAACAGTGCCAACGA 240
TH              TGCCCTGGAACACAGGACCCACTTCTCTGGGGATGTACAGCGCTTCAACAGTGCCAACGA 240
MH              TGCCCTGGAACACAGGACCCACTTCTCTGGGGATGTACAGCGCTTCAACAGTGCCAACGA 240
TB              TGCCCTGGAACACAGGACCCACTTCTCTGGGGATGTACAGCGCTTCAACAGTGCCAACGA 240
MB              TGCCCTGGAACACAGGACCCACTTCTCTGGGGATGTACAGCGCTTCAACAGTGCCAACGA 240
                *****

MK423993.1      TGACAATGTCACTCAGGTGCGGACTTTC                268
TH              TGACAATGTCACTCAGGTGCGGACTTTC                268
MH              TGACAATGTCACTCAGGTGCGGACTTTC                268
TB              TGACAATGTCACTCAGGTGCGGACTTTC                268
MB              TGACAATGTCACTCAGGTGCGGACTTTC                268
                *****

```

**Fig. S6.** Representative DNA sequence alignment of *CAT* gene (268-bp) among tolerant and mastitis affected Holstein and Brown Swiss dairy cows and reference sequence available in the GenBank gb|MK423993.1|. TH= Tolerant Holstein; MH= Mastitic Holstein; TB= Tolerant Brown Swiss and MB= Mastitic Brown Swiss. The asterisks represent the similarity.

|             |                                                              |     |
|-------------|--------------------------------------------------------------|-----|
| NM_174076.3 | GGTCGCCCCGCTTTTAAAGCAGGCGCTTCCGACCCCTTGTTCTTCAAGTCCGCGGCG    | 60  |
| TH          | GGTCGCCCCGCTTTTAAAGCAGGCGCTTCCGACCCCTTGTTCTTCAAGTCCGCGGCG    | 60  |
| MH          | GGTCGCCCCGCTTTTAAAGCAGGCGCTTCCCAACCCCTTGTTCTTCAAGTCCGCGGCG   | 60  |
| TB          | GGTCGCCCCGCTTTTAAAGCAGGCGCTTCCGACCCCTTGTTCTTCAAGTCCGCGGCG    | 60  |
| MB          | GGTCGCCCCGCTTTTAAAGCAGGCGCTTCCGACCCCTTGTTCTTCAAGTCCGCGGCG    | 60  |
| *****       |                                                              |     |
| NM_174076.3 | CTCTGCTCTGGATTTCGAAACGGATACCATGTGCGCCGCTCAGCGCTCGGCGGCCGCCCT | 120 |
| TH          | CTCTGCTCTGGATTTCGAAACGGATACCATGTGCGCCGCTCAGCGCTCGGCGGCCGCCCT | 120 |
| MH          | CTCTGCTCTGGATTTCGAAACGGATACCATGTGCGCCGCTCAGCGCTCGGCGGCCGCCCT | 120 |
| TB          | CTCTGCTCTGGATTTCGAAACGGATACCATGTGCGCCGCTCAGCGCTCGGCGGCCGCCCT | 120 |
| MB          | CTCTGCTCTGGATTTCGAAACGGATACCATGTGCGCCGCTCAGCGCTCGGCGGCCGCCCT | 120 |
| *****       |                                                              |     |
| NM_174076.3 | GGCGGGCGCAGCCCCGCGCACAGTGTACGCCTTCTCCGCGGCCCTCTGGCCGGCGGGGA  | 180 |
| TH          | GGCGGGCGCAGCCCCGCGCACAGTGTACGCCTTCTCCGCGGCCCTCTGGCCGGCGGGGA  | 180 |
| MH          | GGCGGGCGCAGCCCCGCGCACAGTGTACGCCTTCTCCGCGGCCCTCTGGCCGGCGGGGA  | 180 |
| TB          | GGCGGGCGCAGCCCCGCGCACAGTGTACGCCTTCTCCGCGGCCCTCTGGCCGGCGGGGA  | 180 |
| MB          | GGCGGGCGCAGCCCCGCGCACAGTGTACGCCTTCTCCGCGGCCCTCTGGCCGGCGGGGA  | 180 |
| *****       |                                                              |     |
| NM_174076.3 | GCCCTTCAACCTGTCTCCCTGCGGGGCAAGGTGCTGCTCATTGAGAACGTAGCATCGCT  | 240 |
| TH          | GCCCTTCAACCTGTCTCCCTGCGGGGCAAGGTGCTGCTCATTGAGAACGTAGCATCGCT  | 240 |
| MH          | GCCCTTCAACCTGTCTCCCTGCGGGGCAAGGTGCTGCTCATTGAGAACGTAGCATCGCT  | 240 |
| TB          | GCCCTTCAACCTGTCTCCCTGCGGGGCAAGGTGCTGCTCATTGAGAACGTAGCATCGCT  | 240 |
| MB          | GCCCTTCAACCTGTCTCCCTGCGGGGCAAGGTGCTGCTCATTGAGAACGTAGCATCGCT  | 240 |
| *****       |                                                              |     |
| NM_174076.3 | CTGAGGCACAACGGTGCGGGACTACACCCAGATGAATGACCTGCAGCGGCGCCTTGGAAC | 300 |
| TH          | CTGAGGCACAACGGTGCGGGACTACACCCAGATGAATGACCTGCAGCGGCGCCTTGGAAC | 300 |
| MH          | CTGAGGCACAACGGTGCGGGACTACACCCAGATGAATGACCTGCAGCGGCGCCTTGGAAC | 300 |
| TB          | CTGAGGCACAACGGTGCGGGACTACACCCAGATGAATGACCTGCAGCGGCGCCTTGGAAC | 300 |
| MB          | CTGAGGCACAACGGTGCGGGACTACACCCAGATGAATGACCTGCAGCGGCGCCTTGGAAC | 300 |
| *****       |                                                              |     |
| NM_174076.3 | CCGGGGCCTGGTCGTGCTCGGCTTCCCCTGCAACCAGTTTGGGCATCAGGAAAACGCCAA | 360 |
| TH          | CCGGGGCCTGGTCGTGCTCGGCTTCCCCTGCAACCAGTTTGGGCATCAGGAAAACGCCAA | 360 |
| MH          | CCGGGGCCTGGTCGTGCTCGGCTTCCCCTGCAACCAGTTTGGGCATCAGGAAAACGCCAA | 360 |
| TB          | CCGGGGCCTGGTCGTGCTCGGCTTCCCCTGCAACCAGTTTGGGCATCAGGAAAACGCCAA | 360 |
| MB          | CCGGGGCCTGGTCGTGCTCGGCTTCCCCTGCAACCAGTTTGGGCATCAGGAAAACGCCAA | 360 |
| *****       |                                                              |     |
| NM_174076.3 | GAACGAGGAGATCCTGAATTGCCTGAAGTACGTCCGACCAGGCGGCGGGTTCGAGCCCAA | 420 |
| TH          | GAACGAGGAGATCCTGAATTGCCTGAAGTACGTCCGACCAGGCGGCGGGTTCGAGCCCAA | 420 |
| MH          | GAACGAGGAGATCCTGAATTGCCTGAAGTACGTCCGACCAGGCGGCGGGTTCGAGCCCAA | 420 |
| TB          | GAACGAGGAGATCCTGAATTGCCTGAAGTACGTCCGACCAGGCGGCGGGTTCGAGCCCAA | 420 |
| MB          | GAACGAGGAGATCCTGAATTGCCTGAAGTACGTCCGACCAGGCGGCGGGTTCGAGCCCAA | 420 |
| *****       |                                                              |     |
| NM_174076.3 | CTTTATGCTCTTCGAAAAGTGCAGAGTGAATGGCGAGAAGGCGCATCCGCTCTTCGCCTT | 480 |
| TH          | CTTTATGCTCTTCGAAAAGTGCAGAGTGAATGGCGAGAAGGCGCATCCGCTCTTCGCCTT | 480 |
| MH          | CTTTATGCTCTTCGAAAAGTGCAGAGTGAATGGCGAGAAGGCGCATCCGCTCTTCGCCTT | 480 |
| TB          | CTTTATGCTCTTCGAAAAGTGCAGAGTGAATGGCGAGAAGGCGCATCCGCTCTTCGCCTT | 480 |
| MB          | CTTTATGCTCTTCGAAAAGTGCAGAGTGAATGGCGAGAAGGCGCATCCGCTCTTCGCCTT | 480 |
| *****       |                                                              |     |
| NM_174076.3 | CCTTCGGGAGGTTCTGCCCACGCCAAGTGACGACGCCACTGCTCTCATGACCGA       | 534 |
| TH          | CCTTCGGGAGGTTCTGCCCACGCCAAGTGACGACGCCACTGCTCTCATGACCGA       | 534 |
| MH          | CCTTCGGGAGGTTCTGCCCACGCCAAGTGACGACGCCACTGCTCTCATGACCGA       | 534 |
| TB          | CCTTCGGGAGGTTCTGCCCACGCCAAGTGACGACGCCACTGCTCTCATGACCGA       | 534 |
| MB          | CCTTCGGGAGGTTCTGCCCACGCCAAGTGACGACGCCACTGCTCTCATGACCGA       | 534 |
| *****       |                                                              |     |

**Fig. S7.** Representative DNA sequence alignment of *GPXI* gene (534-bp) among tolerant and mastitis affected Holstein and Brown Swiss dairy cows and reference sequence available in the GenBank gb|NM\_174076.3|. TH= Tolerant Holstein; MH= Mastitic Holstein; TB= Tolerant Brown Swiss and MB= Mastitic Brown Swiss. The asterisks represent the similarity.

|                |                                                                |     |
|----------------|----------------------------------------------------------------|-----|
| XM_005210409.4 | TAAGAATTGTTTAACTGAAAAATAAGAAATTTTGTAAATTTAAATGTACACTATGATTT    | 60  |
| TH             | TAAGAATTGTTTAACTGAAAAATAAGAAATTTTGTAAATTTAAATGTACACTATGATTT    | 60  |
| MH             | TAAGAATTGTTTAACTGAAAAATAAGAAATTTTGTAAATTTAAATGTACACTATGATTT    | 60  |
| TB             | TAAGAATTGTTTAACTGAAAAATAAGAAATTTTGTAAATTTAAATGTACACTATGATTT    | 60  |
| MB             | TAAGAATTGTTTAACTGAAAAATAAGAAATTTTGTAAATTTAAATGTACACTATGATTT    | 60  |
|                | *****                                                          |     |
| XM_005210409.4 | GGTGTATACTCTCAAACAGCTTCTACTTCCCACCCCAAGTTGCTTTTATTTAGTGAAC     | 120 |
| TH             | GGTGTATACTCTCAAACAGCTTCTACTTCCCACCCCAAGTTGCTTTTATTTAGTGAAC     | 120 |
| MH             | GGTGTATACTCTCAAACAGCTTCTACTTCCCACCCCAAGTTGCTTTTATTTAGTGAAC     | 120 |
| TB             | GGTGTATACTCTCAAACAGCTTCTACTTCCCACCCCAAGTTGCTTTTATTTAGTGAAC     | 120 |
| MB             | GGTGTATACTCTCAAACAGCTTCTACTTCCCACCCCAAGTTGCTTTTATTTAGTGAAC     | 120 |
|                | *****                                                          |     |
| XM_005210409.4 | AATTGTCGTCTTTTATTTTCTTGAGTCTTAATATCTTTAGTGGGAAGTGCTCCTAGGAAT   | 180 |
| TH             | AATTGTCGTCTTTTATTTTCTTGAGTCTTAATATCTTTAGTGGGAAGTGCTCCTAGGAAT   | 180 |
| MH             | AATTGTCGTCTTTTATTTTCTTGAGTCTTAATATCTTTAGTGGGAAGTGCTCCTAGGAAT   | 180 |
| TB             | AATTGTCGTCTTTTATTTTCTTGAGTCTTAATATCTTTAGTGGGAAGTGCTCCTAGGAAT   | 180 |
| MB             | AATTGTCGTCTTTTATTTTCTTGAGTCTTAATATCTTTAGTGGGAAGTGCTCCTAGGAAT   | 180 |
|                | *****                                                          |     |
| XM_005210409.4 | TCTGATGAAAAGTACAGCAAGATTAAAAATTGATAATTATTAGCAAGTATAATACTGCT    | 240 |
| TH             | TCTGATGAAAAGTACAGCAAGATTAAAAATTGATAATTATTAGCAAGTATAATACTGCT    | 240 |
| MH             | TCTGATGAAAAGTACAGCAAGATTAAAAATTGATAATTATTAGCAAGTATAATACTGCT    | 240 |
| TB             | TCTGATGAAAAGTACAGCAAGATTAAAAATTGATAATTATTAGCAAGTATAATACTGCT    | 240 |
| MB             | TCTGATGAAAAGTACAGCAAGATTAAAAATTGATAATTATTAGCAAGTATAATACTGCT    | 240 |
|                | *****                                                          |     |
| XM_005210409.4 | TTGAACCTAAAAATACGTTTATAACAAGCATATAAAGGTCATACACAAAATATACTTTAAA  | 300 |
| TH             | TTGAACCTAAAAATACGTTTATAACAAGCATATAAAGGTCATACACAAAATATACTTTAAA  | 300 |
| MH             | TTGAACCTAAAAATACGTTTATAACAAGCATATAAAGGTCATACACAAAATATACTTTAAA  | 300 |
| TB             | TTGAACCTAAAAATACGTTTATAACAAGCATATAAAGGTCATACACAAAATATACTTTGAA  | 300 |
| MB             | TTGAACCTAAAAATACGTTTATAACAAGCATATAAAGGTCATACACAAAATATACTTTAAA  | 300 |
|                | *****                                                          |     |
| XM_005210409.4 | GTGTCCAAAAATCTGAATCTATTTTCATGTGTATACAGACAGAAATCATGTTTTTAATAA   | 360 |
| TH             | GTGTCCAAAAATCTGAATCTATTTTCATGTGTATACAGACAGAAATCATGTTTTTAATAA   | 360 |
| MH             | GTGTCCAAAAATCTGAATCTATTTTCATGTGTATACAGACAGAAATCATGTTTTTAATAA   | 360 |
| TB             | GTGTCCAAAAATCTGAATCTATTTTCATGTGTATACAGACAGAAATCATGTTTTTAATAA   | 360 |
| MB             | GTGTCCAAAAATCTGAATCTATTTTCATGTGTATACAGACAGAAATCATGTTTTTAATAA   | 360 |
|                | *****                                                          |     |
| XM_005210409.4 | TGGAAATGGGATAGCTCATAAAAAATTAAAAATTAAGGTGTTTTGGACTATTTTATTAAGTA | 420 |
| TH             | TGGAAATGGGATAGCTCATAAAAAATTAAAAATTAAGGTGTTTTGGACTATTTTATTAAGTA | 420 |
| MH             | TGGAAATGGGATAGCTCATAAAAAATTAAAAATTAAGGTGTTTTGGACTATTTTATTAAGTA | 420 |
| TB             | TGGAAATGGGATAGCTCATAAAAAATTAAAAATTAAGGTGTTTTGGACTATTTTATTAAGTA | 420 |
| MB             | TGGAAATGGGATAGCTCATAAAAAATTAAAAATTAAGGTGTTTTGGACTATTTTATTAAGTA | 420 |
|                | *****                                                          |     |
| XM_005210409.4 | AGGAAACATTGGTGGCCACATCCCTTTATTAACCTTTAGACTTAAACTGCTGAATCATA    | 480 |
| TH             | AGGAAACATTGGTGGCCACATCCCTTTATTAACCTTTAGACTTAAACTGCTGAATCATA    | 480 |
| MH             | AGGAAACATTGGTGGCCACATCCCTTTATTAACCTTTAGACTTAAACTGCTGAATCATA    | 480 |
| TB             | AGGAAACATTGGTGGCCACATCCCTTTATTAACCTTTAGACTTAAACTGCTGAATCATA    | 480 |
| MB             | AGGAAACATTGGTGGCCACATCCCTTTATTAACCTTTAGACTTAAACTGCTGAATCATA    | 480 |
|                | *****                                                          |     |

**Fig. S8.** Representative DNA sequence alignment of *AhpC/TSA* gene (480-bp) among tolerant and mastitis affected Holstein and Brown Swiss dairy cows and reference sequence available in the GenBank gb|XM\_005210409.4|. TH= Tolerant Holstein; MH= Mastitic Holstein; TB= Tolerant Brown Swiss and MB= Mastitic Brown Swiss. The asterisks represent the similarity.
